# Supplementary material
Source: PubMed Central journal article supplement (PMC3710867)
Supplement: 1307100110_pnas.201307100SI.pdf [file 1307100110_pnas.201307100SI.pdf]

# Supporting Information

Kocatürk et al. 10.1073/pnas.1307100110

## SI Text

**Reagents.** Full-length tissue factor (fTF)-specific antibody 10H10, protease activated receptor (PAR)2-, FVII(a)-, and the  $\beta$ 1 integrin antibody AIIB2 were described previously (1). p21 antibody,  $\beta$ 1 integrin antibody (residues 579–799),  $\beta$ 3 integrin-blocking antibody, and HUTS-21 (an antibody that recognizes the active conformation of  $\beta$ 1 integrins) were from Millipore. Rabbit monoclonal antibodies against p27 and human alternatively spliced TF (asTF) (RabMab1, custom made) were from Epitomics. p-MAP kinase/MAP kinase antibodies were from Cell Signaling Technologies. The  $\beta$ 1 peptide was from Prospec-Tany Technogene. fTF-specific antibody and asTF-specific rabbit polyclonal antibody used for immunohistochemistry were from American Diagnostica [4509 (main text, Fig. 1 legend)] or described previously (2), respectively. Mac3 and Ki67 antibodies were from BD Biosciences. Alexa-488 or Alexa-594-labeled antibodies were from Invitrogen.

**Cell Culture, Transfections, and Viral Transductions.** All cells were cultured in DMEM (PAA) with 10% serum, 2 mM L-glutamine, penicillin, and streptomycin. FRT sites were introduced to MCF-7 cells using Lipofectamine 2000 (Invitrogen). Cells were subsequently cultured in media containing 100  $\mu$ g/mL Zeocin, FRT insertion was verified by determining  $\beta$ -Galactosidase expression on Western blot. FRT cell lines (2A3-3 and 2A1-2) were co-transfected with recombinase-encoding pOG44 and pcDNA5-FRT to produce control cells. Similar transfections were carried out with pcDNA5-FRT vector containing cDNA encoding fTF or asTF to produce TF variant-expressing cell lines. The cells undergoing homologous recombination were selected in media containing 150  $\mu$ g/mL hygromycin. Transductions were carried out with shRNA lentiviral particles prepared from the Mission Library (Sigma-Aldrich). Transduced cells were selected with 2  $\mu$ g/mL puromycin.

**Cell Proliferation and Apoptosis Assays.** Cell proliferation was assessed using MTT assays as described previously (3). In some experiments, outcomes of MTT assays were verified using cell counting and DNA analysis. In brief, cells were seeded in 10-cm dishes, lifted, and counted at day 0 and day 3. Proliferation was expressed as an increase in cell number compared with the cell number at day 0. For DNA analysis, cells were lysed in SDS buffer at day 0 and day 3 and DNA contents were measured using Nanodrop. When appropriate, fTF- (10H10, 50  $\mu$ g/mL), asTF- (RabMab1, 50  $\mu$ g/mL),  $\beta$ 1- and  $\beta$ 3 integrin antibodies (50  $\mu$ g/mL),

or a  $\beta$ 1 peptide (1 nM) were added. To measure apoptosis, cells were lifted, incubated with Annexin V/propidium iodide (both Sigma-Aldrich) and measured by FACS (LSR2; Becton Dickinson).

**Western Blotting.** Cells were lysed in sample buffer (Invitrogen). Cell lysates or purified proteins were run on 8–16% gradient gels and transferred to PVDF membranes. Membranes were blocked in 5% nonfat milk powder and incubated with the appropriate primary antibodies, followed by HRP-conjugated secondary antibodies. Protein bands were visualized using Western Lightning ECL (PerkinElmer) and Kodak film (X-Sanatec).

**Integrin ELISA.** Polysorb 96-well plates (Nunc) were mock-coated (control) or coated with 3  $\mu$ g/mL sTF or asTF, and blocked with 1% ovalbumin in PBS/Tween-20 (0.02%). Plates were subsequently exposed to the incubation buffer without or with 5  $\mu$ g/mL recombinant  $\alpha$ 6 $\beta$ 1 (Immunosource), TS2/16 (anti-integrin  $\beta$ 1), and peroxidase-conjugated goat-anti-mouse secondary antibody for 60 min at 37 °C. After washing, TMB was added and the reaction was stopped with H<sub>2</sub>SO<sub>4</sub>.

**Microarray Analysis and Validation.** Total RNA was isolated, amplified and biotin labeled for hybridization on Illumina HumanHT-12 v4 Expression BeadChips using the Illumina Total Prep-96 protocol. Bioconductor ([www.bioconductor.org](http://www.bioconductor.org)) was used for the initial microarray analyses (4). The “lumi” library was used for loading and normalizing the Illumina arrays into R and Loess normalization was applied. A gene-filter library was used for removing genes that did not show significant variations after normalization. Finally, the Limma library was used for performing three statistical comparisons: fTF vs. control, asTF vs. control, and asTF vs. fTF. Selected up-regulated or down-regulated genes were chosen, and expression levels were validated by real-time PCR. The primers are listed in Table S2. The gene array data are accessible at Gene Expression Omnibus (accession no. GSE41872).

**Soft Agar Growth Assay.** Colony formation in soft agar was assayed by plating 10,000 cells in 0.6% agar/DMEM (wt/vol) on top of a 0.75% agar/DMEM layer in 35 mm dishes. Plates were incubated at 37 °C and 5% CO<sub>2</sub> for 14 d. Colonies were visualized using an inverted microscope (Leica DMIL) and Leica DFC295 camera. Cumulative colony size (area covered) and colony numbers were determined using ImageJ software.

1. Versteeg HH, et al. (2008) Inhibition of tissue factor signaling suppresses tumor growth. *Blood* 111(1):190–199.  
2. Srinivasan R, et al. (2011) Splice variants of tissue factor promote monocyte-endothelial interactions by triggering the expression of cell adhesion molecules via integrin-mediated signaling. *J Thromb Haemost* 9(10):2087–2096.

3. Versteeg HH, Evertzen MW, van Deventer SJ, Peppelenbosch MP (2000) The role of phosphatidylinositol-3-kinase in basal mitogen-activated protein kinase activity and cell survival. *FEBS Lett* 465(1):69–73.  
4. Gentleman RC, et al. (2004) Bioconductor: Open software development for computational biology and bioinformatics. *Genome Biol* 5(10):R80.



**Fig. S1.** asTF and fITF are overexpressed in human breast cancer specimens. (A) Representative photographs of tissue microarray punches of human breast cancer specimens (Upper) and matched normal mammary tissue (Lower) immunohistochemically stained using an fITF-specific (Left) or an asTF-specific antibody (Right). Brown color indicates positive staining. (Magnification: 20 $\times$ .) (B) Specificity of the anti-fITF and anti-asTF antibodies, tested on Western blot. The indicated amounts of purified fITF and asTF proteins were loaded on gel. Note the asTF dimers migrating at 98 kDa. (C) Representative confocal image of a breast cancer specimen double-stained with the antibodies in A. Note the intracellular staining of asTF (green) and the fITF staining at the cell periphery (red). Examples of peripheral staining are indicated by arrows. (Scalebar: 100 micron.)



**Fig. S2.** Characterization of TF isoform-expressing 2A3-3 cells. (A) Control vector (pcDNA), fITF or asTF cDNA were stably integrated into the FRT site of 2A3-3 cells and TF isoform expression was verified by PCR using TF-specific primers. Primers against  $\beta$ -actin were used as a control. (B) Expression of fITF and asTF in 2A3-3 cells assessed by Western blot. Antibodies specific for total TF and asTF (monoclonal rabbit antibody RabMab1) were used. (C) TF activity of 2A3-3 control cells and cells expressing fITF or asTF was measured after addition of 10 nM FVIIa and 100 nM FX in HBS. FXa generation was determined after 30 min using a Spectrozyme FXa kinetic assay. (D) FACS analysis of 2A3-3 control cells and cells expressing fITF or asTF. Cells were labeled in suspension with 1  $\mu$ g/mL 10H10 and APC-labeled rabbit anti-mouse secondary antibody. Labeled cells were analyzed on a Becton Dickinson LSR II. Dashed lines indicate mean fluorescence intensity of the same cells, labeled with IgG control. (E) Protein (50  $\mu$ g) from lysates prepared from 2A3-3-asTF, MDA-MB-231mfp cells and five tumor specimens with high asTF expression (as determined in the tissue array analysis) were subjected to Western blotting using anti-asTF RabMab1 as the primary antibody. The same samples were also loaded on SDS/PAGE and stained using Coomassie to verify equal loading. \*\*\* $P = 0.001$ .



**Fig. S3.** Proliferation of asTF-expressing 2A3-3 cells. (A) Proliferation of 2A3-3 cells expressing TF variants was determined using cell counts. (B) Proliferation of 2A3-3 cells expressing TF variants was determined using DNA contents of cellular lysates at day 0 and day 3. Proliferation was expressed as percent increase compared with day 0. (C) Enhanced proliferation of an independently generated second asTF clone was determined using MTT assays. (D) Activation of the unfolded protein response (UPR), as determined by Western blotting. The indicated cell lines were screened for up-regulation of UPR-responsive proteins CCAAT/enhancer-binding protein homologous protein (CHOP) and binding protein (BiP), and phosphorylation of protein kinase RNA-like endoplasmic reticulum kinase (PERK).  $\beta$ -Actin was used as a loading control. (Left) A short exposure of CHOP and BiP levels in these cells, using established UPR activators [2  $\mu$ M Thapsigargin (TG) and 10  $\mu$ g/mL Tunicamycin (TM)] as positive controls. (Right) Basal levels (long exposure) of CHOP and BiP, and PERK phosphorylation in these cells. (E) Presence of cellular protein aggregates was determined using the ProteoStat protein aggregation kit (Enzo Life Sciences). The proteasome inhibitor MG-132 was used as an inducer of protein aggregation (positive control). Images were acquired with a conventional fluorescence microscope (Leica DMI6000B). (Scale bars, 20  $\mu$ m.) (F) Apoptosis was assessed using Annexin V-FITC staining and subsequent FACS analysis. (G) A cell line (2A1-2) containing an FRT site at a transcriptionally less active region was equipped with an empty vector, fTF or asTF cDNA by homologous recombination, and proliferation was monitored using cell counting. \* $P < 0.05$ , \*\* $P = 0.01$ , and \*\*\* $P = 0.001$ .







**Table S1. List of genes included in the heatmap in Fig. 2A**

| Gene                            | asTF vs. control | P value  | fITF vs. control | P value  |
|---------------------------------|------------------|----------|------------------|----------|
| <b>Cytoskeleton regulation</b>  |                  |          |                  |          |
| <i>LCP1</i>                     | 3.742041408      | 4.82E-07 | 1.597922314      | 0.004017 |
| <i>SCIN</i>                     | 2.108646599      | 7.30E-09 | 1.329457586      | 0.000118 |
| <i>TUBB2B</i>                   | 1.928582645      | 0.000285 | 1.477838294      | 0.010475 |
| <i>CORO1A</i>                   | 1.868572756      | 8.27E-06 | 2.14044709       | 1.17E-06 |
| <i>UBE2L6</i>                   | 1.780560434      | 0.000203 | 2.210948723      | 1.14E-05 |
| <i>RDX</i>                      | 1.749752453      | 1.33E-06 | -1.313590672     | 0.000873 |
| <i>HAX1</i>                     | 1.7014436        | 1.56E-05 | 2.036833659      | 8.66E-07 |
| <i>LOC606724</i>                | 1.635658577      | 4.22E-05 | 2.067936846      | 9.50E-07 |
| <i>STMN3</i>                    | 1.470501982      | 0.001837 | 1.852729618      | 3.99E-05 |
| <i>TWF1</i>                     | 1.390079424      | 1.38E-05 | 1.047946252      | 0.326043 |
| <i>RHOD</i>                     | 1.398217432      | 0.001541 | -1.418470373     | 0.001135 |
| <b>Integrin and migration</b>   |                  |          |                  |          |
| <i>BGN</i>                      | 1.859405347      | 0.000335 | -1.049253889     | 0.703295 |
| <i>FERMT2</i>                   | 1.857779519      | 2.67E-06 | 1.193333563      | 0.032271 |
| <i>SMAGP</i>                    | 1.530149351      | 7.72E-05 | 1.574769438      | 4.29E-05 |
| <i>TRIP6</i>                    | 1.433852054      | 8.72E-06 | 1.447503733      | 6.78E-06 |
| <i>ID1</i>                      | 1.429662141      | 0.024691 | 2.92285299       | 6.89E-06 |
| <i>TM4SF1</i>                   | 1.422992101      | 0.041298 | -1.623238739     | 0.008735 |
| <i>ZFYVE21</i>                  | 1.408507583      | 1.50E-06 | 1.303102493      | 1.87E-05 |
| <i>ITGAE</i>                    | 1.370217825      | 1.44E-05 | -1.093804744     | 0.064612 |
| <i>RAPGEF2</i>                  | 1.341491552      | 3.69E-06 | 1.019520069      | 0.597044 |
| <b>Angiogenesis inducer</b>     |                  |          |                  |          |
| <i>CTSH</i>                     | 2.078278757      | 1.30E-06 | 1.227613867      | 0.025359 |
| <i>PTGES</i>                    | 1.804505885      | 1.98E-05 | -1.16678851      | 0.095746 |
| <i>METAP1</i>                   | 1.451736383      | 4.43E-06 | 1.279896922      | 0.000197 |
| <i>HIF1A</i>                    | 1.442084355      | 0.000576 | -1.069079685     | 0.407952 |
| <i>NCL</i>                      | 1.42837763       | 0.000151 | -1.02074889      | 0.755335 |
| <i>PLA2G3</i>                   | 1.34121158       | 8.50E-06 | 1.361032506      | 5.28E-06 |
| <b>Cell cycle</b>               |                  |          |                  |          |
| <i>CCNA1</i>                    | 3.444212992      | 1.03E-09 | 1.311815883      | 0.00223  |
| <i>TEAD2</i>                    | 1.999153596      | 0.001922 | 2.719114401      | 0.000105 |
| <i>CCNA2</i>                    | 1.689827846      | 1.02E-07 | 1.351804407      | 2.68E-05 |
| <i>ANAPC10</i>                  | 1.684016033      | 9.30E-08 | 1.174051955      | 0.003684 |
| <i>MAD2L1</i>                   | 1.584491419      | 1.23E-05 | 1.192226934      | 0.017    |
| <i>CBL</i>                      | 1.506003722      | 0.000116 | -1.00792761      | 0.914163 |
| <i>CDC5L</i>                    | 1.45321681       | 0.001637 | 1.130303557      | 0.205681 |
| <i>ID3</i>                      | 1.444140914      | 0.021992 | 1.864606082      | 0.000831 |
| <i>ID1</i>                      | 1.429662141      | 0.024691 | 2.92285299       | 6.89E-06 |
| <i>PIR</i>                      | 1.376465624      | 2.23E-05 | 1.146793418      | 0.012949 |
| <i>LIN54</i>                    | 1.373650529      | 0.000956 | 1.261968371      | 0.007639 |
| <i>MNAT1</i>                    | 1.37187435       | 0.002633 | -1.05517336      | 0.528861 |
| <i>LCMT1</i>                    | 1.368999315      | 0.000314 | 1.35855059       | 0.000383 |
| <i>MRS2</i>                     | 1.360460762      | 1.16E-05 | 1.079358084      | 0.094399 |
| <i>NUP153</i>                   | 1.351409693      | 0.000212 | 1.077304377      | 0.213649 |
| <i>GMNN</i>                     | 1.344105524      | 0.008987 | 1.090079751      | 0.37861  |
| <b>Tumor cell proliferation</b> |                  |          |                  |          |
| <i>H19</i>                      | 3.489019144      | 2.00E-12 | 2.954286767      | 1.01E-11 |
| <i>MDK</i>                      | 2.454063596      | 2.31E-05 | 1.387160376      | 0.029261 |
| <i>GAL</i>                      | 2.037698068      | 0.000246 | 1.512087264      | 0.010815 |
| <i>PCSK1N</i>                   | 1.862575221      | 1.26E-06 | 1.567716533      | 2.98E-05 |
| <i>MND1</i>                     | 1.860190359      | 6.09E-07 | 1.438271735      | 0.000105 |
| <i>ODC1</i>                     | 1.834345353      | 1.52E-06 | 1.81512049       | 1.82E-06 |
| <i>SLC16A3</i>                  | 1.761121624      | 0.000333 | 1.313471999      | 0.032633 |
| <i>TIMP1</i>                    | 1.760619541      | 0.000204 | 1.180564302      | 0.143626 |
| <i>TBX2</i>                     | 1.658101848      | 0.000721 | -1.381987092     | 0.013261 |
| <i>PHF19</i>                    | 1.647718256      | 3.45E-05 | 1.488760883      | 0.000253 |
| <i>MAPK13</i>                   | 1.536585166      | 0.000472 | 2.035143814      | 5.15E-06 |
| <i>FABP5</i>                    | 1.532500067      | 1.20E-07 | 1.384337539      | 2.01E-06 |
| <i>EIF4E</i>                    | 1.547804854      | 0.001    | 1.020291222      | 0.843895 |
| <i>PFKM</i>                     | 1.481369052      | 0.000113 | 1.731273689      | 5.05E-06 |
| <i>HOXB7</i>                    | 1.463554404      | 4.50E-05 | 1.147175144      | 0.041784 |
| <i>FGFR3</i>                    | 1.462154414      | 0.000446 | 1.341156069      | 0.002959 |

Table S1. Cont.

| Gene             | asTF vs. control | P value  | fitF vs. control | P value  |
|------------------|------------------|----------|------------------|----------|
| <i>MARCKS</i>    | 1.423358397      | 0.002797 | -1.297591069     | 0.016804 |
| <i>PRR5</i>      | 1.422956559      | 0.000163 | 1.159269894      | 0.041068 |
| <i>RAP1GDS1</i>  | 1.417514749      | 4.30E-06 | 1.186787763      | 0.00195  |
| <i>PPIL1</i>     | 1.416748859      | 0.00359  | 1.195002505      | 0.087845 |
| <i>PFKP</i>      | 1.409792362      | 1.42E-05 | 1.502888233      | 2.68E-06 |
| <i>ATOX1</i>     | 1.405348878      | 0.000415 | 2.200283203      | 1.38E-07 |
| <i>YWHAG</i>     | 1.400002412      | 0.000612 | 1.006903933      | 0.925548 |
| <i>PLOD3</i>     | 1.386953228      | 0.002265 | 1.22269681       | 0.034265 |
| <i>PBK</i>       | 1.362937947      | 0.00072  | 1.537087528      | 4.54E-05 |
| <i>RAP1GDS1</i>  | 1.347424073      | 2.88E-06 | 1.060408762      | 0.1227   |
| <i>FDFT1</i>     | 1.344708736      | 0.134579 | 1.046267955      | 0.810124 |
| <i>CALM1</i>     | 1.341930602      | 0.000384 | 1.342218442      | 0.000381 |
| Invasion         |                  |          |                  |          |
| <i>FAM5C</i>     | 2.092361538      | 7.64E-09 | 1.408929672      | 2.08E-05 |
| <i>LMO4</i>      | 1.539098114      | 1.30E-05 | 1.395712469      | 0.000135 |
| <i>ACSL4</i>     | 1.475175376      | 1.28E-07 | 1.333133311      | 2.87E-06 |
| <i>HMGNS</i>     | 1.451825346      | 2.79E-05 | 1.262108012      | 0.001409 |
| <i>FGFR4</i>     | 1.418287964      | 9.36E-05 | 1.629394916      | 4.06E-06 |
| <i>MMP9</i>      | 1.383610445      | 1.05E-05 | 1.308708358      | 6.07E-05 |
| <i>CUX1</i>      | 1.383282194      | 0.00048  | 1.223505839      | 0.011696 |
| <i>EGR3</i>      | 1.354850524      | 0.002475 | 1.069302011      | 0.412034 |
| <i>PTTG1</i>     | 1.341683457      | 0.000607 | 1.656079806      | 4.92E-06 |
| <i>SEMA3E</i>    | 1.332027901      | 0.243818 | -1.383155273     | 0.190906 |
| <i>SMAGP</i>     | 1.330776688      | 0.00024  | 1.415029063      | 4.39E-05 |
| mRNA splicing    |                  |          |                  |          |
| <i>HNRNPH1</i>   | 1.928871989      | 0.000228 | 1.238105925      | 0.1129   |
| <i>SNRPC</i>     | 1.82563735       | 3.20E-06 | 1.445397593      | 0.000289 |
| <i>HNRPDL</i>    | 1.572832064      | 9.64E-05 | 1.353544414      | 0.002292 |
| <i>HNRNPH3</i>   | 1.509978879      | 3.07E-05 | 1.309311687      | 0.001083 |
| <i>HNRNPU</i>    | 1.508793814      | 0.026946 | -1.161521139     | 0.374949 |
| <i>LSM6</i>      | 1.485474582      | 0.003655 | 1.017512615      | 0.875937 |
| <i>SRPK1</i>     | 1.437383427      | 9.62E-05 | 1.053853601      | 0.415897 |
| <i>SNRPC</i>     | 1.42544196       | 0.000444 | 1.353365203      | 0.001476 |
| <i>PRCC</i>      | 1.361638994      | 0.001173 | 1.226295917      | 0.015717 |
| <i>THOC5</i>     | -1.331761098     | 0.000936 | -1.01730332      | 0.796002 |
| <i>KHSRP</i>     | -1.357140125     | 0.002549 | 1.16120239       | 0.085754 |
| <i>SNRPD3</i>    | -1.391235152     | 2.91E-05 | -1.149889184     | 0.016124 |
| <i>LSM14A</i>    | -1.412268479     | 3.25E-05 | -1.276059742     | 0.000633 |
| <i>TTF2</i>      | -1.423558516     | 0.000219 | -1.07828293      | 0.280668 |
| <i>SRPK2</i>     | -1.899174927     | 1.74E-05 | -1.800406495     | 3.90E-05 |
| Cell survival    |                  |          |                  |          |
| <i>MSLN</i>      | 1.759854431      | 5.95E-07 | 1.142949637      | 0.038443 |
| <i>GPX3</i>      | 1.73571357       | 1.79E-05 | 1.252757581      | 0.010156 |
| <i>GPX8</i>      | 1.644675123      | 3.80E-07 | 1.352780874      | 5.08E-05 |
| <i>UBE2D3</i>    | 1.52981016       | 5.55E-05 | 1.438741757      | 0.000216 |
| <i>LAMTOR3</i>   | 1.520041452      | 8.40E-08 | 1.178291252      | 0.000614 |
| <i>SIVA1</i>     | 1.403788792      | 0.000222 | 1.602042598      | 1.15E-05 |
| <i>BCAS2</i>     | 1.365068982      | 0.066403 | -1.27417534      | 0.141433 |
| <i>RBM38</i>     | 1.362618327      | 0.005194 | 1.098192724      | 0.318759 |
| <i>HMGA1</i>     | 1.35714425       | 0.088863 | 1.393404303      | 0.067435 |
| <i>WBSCR22</i>   | 1.342446449      | 0.000828 | 1.465913378      | 9.70E-05 |
| <i>IER3</i>      | 1.333800324      | 0.082352 | 1.506736772      | 0.019669 |
| Tumor suppressor |                  |          |                  |          |
| <i>MB</i>        | -1.33064222      | 0.00093  | -1.446513458     | 0.000116 |
| <i>CDH1</i>      | -1.332727303     | 0.00057  | -1.202639385     | 0.011018 |
| <i>STAT1</i>     | -1.339818537     | 5.97E-06 | -1.400991988     | 1.45E-06 |
| <i>PLK2</i>      | -1.367464292     | 4.18E-05 | -1.37124953      | 3.86E-05 |
| <i>CCDC6</i>     | -1.370125987     | 4.79E-05 | -1.254761305     | 0.000751 |
| <i>LRRC26</i>    | -1.372949147     | 7.11E-05 | 1.170114234      | 0.011712 |
| <i>ENO1</i>      | -1.375689186     | 3.63E-05 | -1.074586971     | 0.169045 |
| <i>PRDM4</i>     | -1.378877472     | 0.001111 | -1.045399441     | 0.562209 |
| <i>RND3</i>      | -1.393657887     | 0.001223 | -1.022880967     | 0.776587 |



**Table S2. Primer pairs used in SYBR-Green based real-time PCR**

| Gene          | Forward primer             | Reverse primer           |
|---------------|----------------------------|--------------------------|
| <i>LCP1</i>   | TGCCGGCAGTTTGT CACA        | GGCAATAAAAGCCAAGTTCAACTT |
| <i>FERMT2</i> | AAAACAATGACCCCACTTATGA     | GTCACCAAACCAAGCAGAAGTTG  |
| <i>CCNA1</i>  | CCATCGACCTCAGCAAGCA        | TGGTCCATGAGGGACACA       |
| <i>MDK</i>    | GGTGCCCTGCAACTGGAA         | ACGCACCCAGTTCTCAAAC      |
| <i>FAM5c</i>  | CAGCACCTTCGGAGACTTC        | CCAGTCCGTGTTTCTGTTACCTT  |
| <i>MSLN</i>   | TGGACTTGGCCACGTTT CAT      | TGCACCTCAGCCACAGTCA      |
| <i>CDH18</i>  | AAACTTCACTCTGAAGGACAATGAAG | CCCATCTCTCTCGCATGCA      |
| <i>EFEMP1</i> | CCAACCCTTCCCACCGTAT        | TGTCTTGGCACACGTTGTGTT    |
| <i>DRAM1</i>  | AACTTGGTGTCTTTAGTGCTT GGA  | ACTCCTGAAAATTGGCGACAA    |

Primer sequences are from 5' to 3'. *LCP1*, lymphocyte cytosolic protein 1; *FERMT2*, fermitin family homologue 2; *MDK*, midkine; *MSLN*, mesothelin; *CDH18*: cadherin 18; *EFEMP1*, EGF containing fibulin-like extracellular matrix protein 1; *DRAM1*, DNA-damage regulated autophagy modulator 1; *FAM5c*, family with sequence similarity 5, member C.
